# Supplementary material for: Risk prediction of postoperative renal dysfunction based on preoperative lipid profiles in renal transplant recipients: A retrospective cohort study
Source: Research Square preprint supplement (doi:10.21203/rs.3.rs-5823279/v1), 2025-01-15
Supplement: Supplementary file 1 [file 06b612e24922e45c5e7fd8d9.docx]

Table S5 Trend Analysis of Calibration Model

|  | Q1  （n=90） | Q2  （95%CI，n=83） | Q3  （95%CI，n=86） | Q4  （95%CI，n=86） | P Value for trend |
| --- | --- | --- | --- | --- | --- |
| Crude Model1 | 1.00 | 1.16（0.64-2.12） | 2.11（1.15-3.86） | 2.73（1.47-5.06） | 0.0003 |
|  |  | 0.621 | 0.015 | 0.001 |  |
| Adjusted Model 2 | 1.00 | 1.09（0.583-2.03） | 1.93（1.03-3.64） | 2.38（1.26-4.55） | 0.0026 |
|  |  | 0.793 | 0.041 | 0.008 |  |
| Adjusted Model 3 | 1.00 | 1.16（0.606-2.210） | 2.57（1.33-5.05） | 3.17（1.59-6.28） | 0.00016 |
|  |  | 0.656 | 0.005 | 0.001 |  |

Preoperative non HDL-C was divided into four groups based on quartiles (Q1, Q2, Q3, Q4), where n represents the sample size and the default confidence level is 95%. Single factor logistic regression was used as the Crude model1, and the model Adjusted model2 was calibrated using "sex" and "age". The model Adjusted model3 was calibrated using "age", "sex", "non HDL-C", "HDL-C", and "LDL-C".
