# Supplementary material for: Risk prediction of postoperative renal dysfunction based on preoperative lipid profiles in renal transplant recipients: A retrospective cohort study
Source: Research Square preprint supplement (doi:10.21203/rs.3.rs-5823279/v1), 2025-01-15
Supplement: Supplementary file 2 [file 1c2fa5c3ed9ab3f4d13ff734.docx]

Table S2 Weighted importance of all features

|  | RF | XGBoost | LightGBM | Weighted |
| --- | --- | --- | --- | --- |
| preTG | 0.1116 | 0.0622 | 0.1183 | 0.096587 |
| medical payment methods | 0.0098 | 0.2610 | 0.0001 | 0.094190 |
| prenon-HDL-C | 0.0928 | 0.0565 | 0.1048 | 0.084106 |
| age | 0.0866 | 0.0580 | 0.1003 | 0.081152 |
| preFPG | 0.0881 | 0.0430 | 0.0872 | 0.072076 |
| preTC | 0.0766 | 0.0429 | 0.0910 | 0.069605 |
| preALB | 0.0810 | 0.0427 | 0.0753 | 0.065762 |
| preHDL-C | 0.0914 | 0.0541 | 0.1264 | 0.063549 |
| gender | 0.0406 | 0.0642 | 0.0700 | 0.05840 |
| preLDL-C | 0.0758 | 0.0411 | 0.0441 | 0.053230 |
