# Supplementary material for: Risk prediction of postoperative renal dysfunction based on preoperative lipid profiles in renal transplant recipients: A retrospective cohort study
Source: Research Square preprint supplement (doi:10.21203/rs.3.rs-5823279/v1), 2025-01-15
Supplement: Supplementary file 3 [file 325af61604c54bc5f5b990e2.docx]

Table S3 Importance of all features

|  | Pearson Value | p |
| --- | --- | --- |
| gender | 0.241078 | 0.000006 |
| age | 0.195275 | 0.000263 |
| prenon-HDL-C | 0.195064 | 0.000267 |
| preHDL-C | 0.172942 | 0.001260 |
| preTG | 0.164450 | 0.002182 |
| preLDL-C | 0.132041 | 0.014112 |
| preALB | 0.119484 | 0.026472 |
| preTC | 0.118324 | 0.027984 |
| preFPG | 0.112582 | 0.036601 |
