# Supplementary material for: Risk prediction of postoperative renal dysfunction based on preoperative lipid profiles in renal transplant recipients: A retrospective cohort study
Source: Research Square preprint supplement (doi:10.21203/rs.3.rs-5823279/v1), 2025-01-15
Supplement: Supplementary file 4 [file d3fa3349175f4cc73a5195fe.docx]

Table S4 Trend Analysis

|  | Q1 | Q2 | Q3 | Q4 | P Value for trend |
| --- | --- | --- | --- | --- | --- |
| preHDL-C | 1.00 | 0.68 | 0.59 | 0.44 | 0.008 |
| prenon-HDL-C | 1.00 | 1.23 | 2.18 | 2.82 | 0.0002 |
| preLDL-C | 1.00 | 1.23 | 2.49 | 1.58 | 0.036 |
| preTC | 1.00 | 1.03 | 1.42 | 1.22 | 0.055 |
| PreTG | 1.00 | 1.56 | 1.42 | 1.26 | 0.056 |
| preALB | 1.00 | 0.71 | 0.59 | 0.59 | 0.085 |
| preFPG | 1.00 | 1.73 | 2.06 | 1.65 | 0.098 |
