# Supplementary material for: Risk prediction of postoperative renal dysfunction based on preoperative lipid profiles in renal transplant recipients: A retrospective cohort study
Source: Research Square preprint supplement (doi:10.21203/rs.3.rs-5823279/v1), 2025-01-15
Supplement: Supplementary file 5 [file f3dec727de81f1f15cc210f0.docx]

Table S1 Importance of all features

|  | RF | XGBoost | LightGBM |
| --- | --- | --- | --- |
| prenonHDL-C | 0.0928 | 0.0565 | 0.1048 |
| preHDL-C | 0.0914 | 0.0541 | 0.1264 |
| age | 0.0866 | 0.0580 | 0.1003 |
| preLDL-C | 0.0758 | 0.0411 | 0.0441 |
| gender | 0.0406 | 0.0643 | 0.0700 |
| preTG | 0.1116 | 0.0622 | 0.1183 |
| preTC | 0.0766 | 0.0429 | 0.0910 |
| preFPG | 0.0881 | 0.0430 | 0.0872 |
| DBP | 0.0676 | 0.0369 | 0.0540 |
| SBP | 0.0646 | 0.0306 | 0.0642 |
| dialysis modality_1 | 0.0156 | 0.0616 | 0.0326 |

Abbreviations: prenonHDL-C, preHDL-C, preLDL-C, preTG, preTC and preFPG are preoperative non HDL-C, HDL-C, LDL-C, TG, TC and FPG.
